# Supplementary material
Source: PubMed Central journal article supplement (PMC3078452)
Supplement: mmc2.pdf [file mmc2.pdf]

**Supplementary Table 1. Backgrounds of cases examined via MCAM analysis**

| Stage I-III CRC |     |     |           |             |                    |
|-----------------|-----|-----|-----------|-------------|--------------------|
| No.             | Sex | Age | Location† | CIMP status | TNM classification |
| 1               | F   | 67  | Distal    | Negative    | III                |
| 2               | F   | 79  | Proximal  | Positive    | II                 |
| 3               | M   | 73  | Distal    | Negative    | I                  |
| 4               | M   | 44  | Distal    | Negative    | III                |
| 5               | M   | 64  | Distal    | Negative    | II                 |
| 6               | M   | 72  | Distal    | Negative    | I                  |
| 7               | M   | 71  | Proximal  | Positive    | II                 |
| 8               | M   | 52  | Distal    | Negative    | II                 |

## Paired primary CRC and Liver metastasis

| No. | Sex | Age | Location† | CIMP status |                  |
|-----|-----|-----|-----------|-------------|------------------|
|     |     |     |           | CRC         | Liver metastasis |
| 1   | F   | 64  | Distal    | Positive    | Negative         |
| 2   | F   | 44  | Distal    | Negative    | Negative         |
| 3   | M   | 73  | Proximal  | Positive    | Positive         |
| 4   | M   | 43  | Distal    | Negative    | Negative         |
| 5   | M   | 57  | Proximal  | Negative    | Negative         |
| 6   | M   | 69  | Distal    | Negative    | Negative         |
| 7   | M   | 71  | Proximal  | Negative    | Negative         |
| 8   | M   | 63  | Proximal  | Negative    | Negative         |
| 9   | F   | 55  | Distal    | Negative    | Negative         |

† location of primary tumors; Proximal, cecum, ascending and transverse colon; Distal, descending and sigmoid colon and rectum.
