# Supplementary material
Source: PubMed Central journal article supplement (PMC3078452)
Supplement: mmc3.pdf [file mmc3.pdf]

**Supplementary Table 2.** List of hypermethylated genes in stage I-III and stage IV CRCs

|                                                            | GeneName            | Location*                 |
|------------------------------------------------------------|---------------------|---------------------------|
| Frequently methylated only in stage I-III CRCs (291 genes) |                     |                           |
|                                                            | <i>MFSD7</i>        | chr4:673998-674058        |
|                                                            | <i>AKAP12</i>       | chr6:151688516-151719602  |
|                                                            | <i>TMEM46</i>       | chr13:25516735-25523198   |
|                                                            | <i>NFATC1</i>       | chr18:75388107-75390311   |
|                                                            | <i>ZNF382</i>       | chr19:41788061-41811339   |
|                                                            | <i>CCDC8</i>        | chr19:51605929-51608681   |
|                                                            | <i>CDO1</i>         | chr5:115168329-115180304  |
|                                                            | <i>IRF4</i>         | chr6:336752-347637        |
|                                                            | <i>OPRK1</i>        | chr8:54300829-54326747    |
|                                                            | <i>VIM</i>          | chr10:17311281-17319598   |
|                                                            | <i>CCNT1</i>        | chr12:47373019-47397048   |
|                                                            | <i>WDR81</i>        | chr17:1577613-1588629     |
|                                                            | <i>LHX1</i>         | chr17:32369870-32372804   |
|                                                            | <i>LIMD2</i>        | chr17:59126981-59131777   |
|                                                            | <i>GALR1</i>        | chr18:73090996-73111084   |
|                                                            | <i>ARHGEF18</i>     | chr19:7417929-7443363     |
|                                                            | <i>NTSR1</i>        | chr20:60810634-60864568   |
|                                                            | <i>SCARF2</i>       | chr22:19108875-19122146   |
|                                                            | <i>KLHDC7B</i>      | chr22:49333328-49335409   |
|                                                            | <i>IGSF21</i>       | chr1:18560448-18577563    |
|                                                            | <i>C1orf61</i>      | chr1:154662053-154667117  |
|                                                            | <i>MIXL1</i>        | chr1:224478006-224480136  |
|                                                            | <i>SPDYA</i>        | chr2:28892367-28917179    |
|                                                            | <i>SIX2</i>         | chr2:45085847-45090047    |
|                                                            | <i>ARHGEF4</i>      | chr2:131404995-131521306  |
|                                                            | <i>FNI</i>          | chr2:215943262-215956451  |
|                                                            | <i>WWTR1</i>        | chr3:150720722-150903805  |
|                                                            | <i>RNF150</i>       | chr4:142006175-142274066  |
|                                                            | <i>ADAMTS16</i>     | chr5:5193443-5373412      |
|                                                            | <i>PACSIN1</i>      | chr6:34590642-34610978    |
|                                                            | <i>KCNK9</i>        | chr8:140699431-140784481  |
|                                                            | <i>BC027908:289</i> | chr10:125757497-125757497 |
|                                                            | <i>FANK1</i>        | chr10:127575098-127688151 |
|                                                            | <i>BCAT1</i>        | chr12:24855546-24993575   |
|                                                            | <i>COL4A1</i>       | chr13:109599442-109757497 |
|                                                            | <i>LBXCOR1</i>      | chr15:65904995-65913228   |
|                                                            | <i>SNTB2</i>        | chr16:67778551-67900456   |
|                                                            | <i>ALOX12</i>       | chr17:6853532-6854779     |
|                                                            | <i>TRMT1</i>        | chr19:13076715-13088563   |
|                                                            | <i>NPAS1</i>        | chr19:52215983-52240857   |

|  |                      |                           |
|--|----------------------|---------------------------|
|  | <i>ZNF671</i>        | chr19:62922931-62930807   |
|  | <i>EEF1A2</i>        | chr20:61589810-61600949   |
|  | <i>GALNT14</i>       | chr2:31008438-31231572    |
|  | <i>GAD2</i>          | chr10:26545600-26548253   |
|  | <i>FGF14</i>         | chr13:101171206-101852125 |
|  | <i>HBQ1</i>          | chr16:170335-171178       |
|  | <i>SLC6A2</i>        | chr16:54247523-54295201   |
|  | <i>RAB34</i>         | chr17:24065430-24069314   |
|  | <i>RNF126</i>        | chr19:598526-614227       |
|  | <i>ZNF154</i>        | chr19:62903622-62912391   |
|  | <i>BC057764:-301</i> | chr2:132621639-132635995  |
|  | <i>EVC2</i>          | chr4:5615053-5762176      |
|  | <i>ANXA5</i>         | chr4:122808602-122837597  |
|  | <i>POU4F2</i>        | chr4:147779495-147783073  |
|  | <i>BVES</i>          | chr6:105651392-105691742  |
|  | <i>CDKN2A</i>        | chr9:21964476-21964826    |
|  | <i>DCLRE1C</i>       | chr10:14988877-15036100   |
|  | <i>KCNA1</i>         | chr12:4890806-4892293     |
|  | <i>RNF113B</i>       | chr13:97626040-97627522   |
|  | <i>RASGRF1</i>       | chr15:77057777-77143996   |
|  | <i>RPRML</i>         | chr17:42410521-42411613   |
|  | <i>SDCBP2</i>        | chr20:1238621-1257838     |
|  | <i>MAFB</i>          | chr20:38747931-38751290   |
|  | <i>GNAS</i>          | chr20:56899820-56919645   |
|  | <i>PDXK</i>          | chr21:43963406-44006616   |
|  | <i>DHRS3</i>         | chr1:12561571-12600407    |
|  | <i>RSPO1</i>         | chr1:37850008-37873078    |
|  | <i>ATP8B2</i>        | chr1:152567899-152576644  |
|  | <i>MFSD4</i>         | chr1:203804735-203838669  |
|  | <i>PTPRN</i>         | chr7:157024516-158073179  |
|  | <i>EDEM1</i>         | chr3:5204433-5236642      |
|  | <i>DALRD3</i>        | chr3:49027439-49033471    |
|  | <i>MINA</i>          | chr3:99143351-99173985    |
|  | <i>MSX1</i>          | chr4:4912293-4916561      |
|  | <i>C6orf114</i>      | chr6:13578081-13578491    |
|  | <i>TRAF3IP2</i>      | chr6:112000613-112034014  |
|  | <i>IGFBP3</i>        | chr7:45918369-45927396    |
|  | <i>EPHB4</i>         | chr7:100238123-100263079  |
|  | <i>LBX1</i>          | chr10:102976723-102978707 |
|  | <i>ACY3</i>          | chr11:67166602-67174706   |
|  | <i>ZIC5</i>          | chr13:99413276-99422179   |
|  | <i>MESP1</i>         | chr15:88094110-88095545   |
|  | <i>CIDEA</i>         | chr18:12244628-12267594   |

|  |                  |                               |
|--|------------------|-------------------------------|
|  | <i>ST8SIA5</i>   | chr18:42525411-42591037       |
|  | <i>MATK</i>      | chr19:3728967-3737415         |
|  | <i>ICAM1</i>     | chr19:10242517-10258291       |
|  | <i>C20orf117</i> | chr20:34845599-34878124       |
|  | <i>ZNF335</i>    | chr20:44027674-44032271       |
|  | <i>CDH4</i>      | chr20:59608229-59945694       |
|  | <i>FOXD3</i>     | chr1:63561318-63563385        |
|  | <i>NTRK1</i>     | chr1:155097295-155118266      |
|  | <i>HLX1</i>      | chr1:219119366-219125023      |
|  | <i>ITPKB</i>     | chr1:224961524-224993499      |
|  | <i>FKBP1B</i>    | chr2:24130276-24140054        |
|  | <i>BOC</i>       | chr3:114414065-114473142      |
|  | <i>MCF2L2</i>    | chr3:184428511-184628549      |
|  | <i>GSH2</i>      | chr4:54661005-54662879        |
|  | <i>TCF7</i>      | chr5:133507182-133511819      |
|  | <i>MGC13017</i>  | chr2:114073075-114075623      |
|  | <i>FOXC1</i>     | chr6:1555680-1559128          |
|  | <i>BMP6</i>      | chr6:7672010-7826960          |
|  | <i>TRIM26</i>    | chr6_qbl_hap2:1399094-1428021 |
|  | <i>DDR1</i>      | chr6_qbl_hap2:2097628-2114869 |
|  | <i>HTR1B</i>     | chr6:78228667-78229839        |
|  | <i>OLIG3</i>     | chr6:137855029-137857224      |
|  | <i>SNX10</i>     | chr7:26370470-26380474        |
|  | <i>LIMK1</i>     | chr7:73136092-73174790        |
|  | <i>SLC25A40</i>  | chr7:87303354-87343604        |
|  | <i>DGKI</i>      | chr7:136724925-137182149      |
|  | <i>ADRA1A</i>    | chr8:26669830-26778839        |
|  | <i>DUSP4</i>     | chr8:29249537-29264104        |
|  | <i>PSKH2</i>     | chr8:87129807-87150967        |
|  | <i>LAPTM4B</i>   | chr8:98856985-98934006        |
|  | <i>C9orf93</i>   | chr9:15542872-15734775        |
|  | <i>ODF2</i>      | chr9:130258550-130287574      |
|  | <i>HPSE2</i>     | chr10:100208867-100985609     |
|  | <i>SLC18A2</i>   | chr10:118990706-119027085     |
|  | <i>MGMT</i>      | chr10:131155456-131455358     |
|  | <i>STK32C</i>    | chr10:133888649-133996053     |
|  | <i>C10orf93</i>  | chr10:134600613-134606054     |
|  | <i>BTG4</i>      | chr11:110872450-110888274     |
|  | <i>PRPF40B</i>   | chr12:48311910-48324716       |
|  | <i>FOXO1</i>     | chr13:39946131-40083264       |
|  | <i>PHF11</i>     | chr13:48968529-49001118       |
|  | <i>FARP1</i>     | chr13:97593435-97900024       |
|  | <i>KDELC1</i>    | chr13:102234632-102249405     |

|  |                 |                          |
|--|-----------------|--------------------------|
|  | <i>TRIM9</i>    | chr14:50532535-50632172  |
|  | <i>PUNC</i>     | chr15:63407664-63408988  |
|  | <i>ZNF771</i>   | chr16:30326437-30348421  |
|  | <i>PRR14</i>    | chr16:30572931-30574036  |
|  | <i>PARD6A</i>   | chr16:66252636-66254182  |
|  | <i>KIAA0182</i> | chr16:84254451-84267313  |
|  | <i>NEUROD2</i>  | chr17:35015230-35016378  |
|  | <i>HSPB9</i>    | chr17:37528395-37528874  |
|  | <i>CYB561</i>   | chr17:58863397-58877277  |
|  | <i>SLC16A5</i>  | chr17:70596628-70613843  |
|  | <i>FLJ35220</i> | chr17:76003710-76018737  |
|  | <i>CCDC57</i>   | chr17:77704775-77736165  |
|  | <i>BRUNOL4</i>  | chr18:33077006-33399998  |
|  | <i>REEP6</i>    | chr19:1442165-1448924    |
|  | <i>GIPC3</i>    | chr19:3536569-3541434    |
|  | <i>ZNF557</i>   | chr19:7020471-7038978    |
|  | <i>ELAVL3</i>   | chr19:11423143-11452803  |
|  | <i>CACNA1A</i>  | chr19:13178257-13478274  |
|  | <i>GGN</i>      | chr19:43567901-43570508  |
|  | <i>RELB</i>     | chr19:50196552-50233292  |
|  | <i>ZNF586</i>   | chr19:62972837-62983796  |
|  | <i>SRC</i>      | chr20:35407971-35467235  |
|  | <i>PLTP</i>     | chr20:43960804-43974193  |
|  | <i>RBM38</i>    | chr20:55399870-55417792  |
|  | <i>STX16</i>    | chr20:56659734-56687988  |
|  | <i>DERL3</i>    | chr22:22506911-22511201  |
|  | <i>WDR45</i>    | chrX:48819036-48845003   |
|  | <i>PLP2</i>     | chrX:48915217-48918382   |
|  | <i>NKAP</i>     | chrX:118943051-118961763 |
|  | <i>MTM1</i>     | chrX:149487705-149592274 |
|  | <i>PAX7</i>     | chr1:18830087-18935219   |
|  | <i>SFPQ</i>     | chr1:35421788-35431322   |
|  | <i>UROD</i>     | chr1:45250417-45252835   |
|  | <i>KCND3</i>    | chr1:112119977-112333300 |
|  | <i>SEMA6C</i>   | chr1:149370787-149385728 |
|  | <i>SLC39A1</i>  | chr1:152198212-152206812 |
|  | <i>HNRPU</i>    | chr1:243080225-243094450 |
|  | <i>MYCN</i>     | chr2:15999497-16004580   |
|  | <i>MSH2</i>     | chr2:47526191-47555913   |
|  | <i>MAP4K4</i>   | chr2:101847824-101877584 |
|  | <i>LYPD6</i>    | chr2:149932738-150038384 |
|  | <i>GAD1</i>     | chr2:171413823-171425905 |
|  | <i>OBFC2A</i>   | chr2:192251961-192259906 |

|  |                      |                          |
|--|----------------------|--------------------------|
|  | <i>FLJ37953</i>      | chr2:200515053-200528704 |
|  | <i>PTHR2</i>         | chr2:209061982-209413063 |
|  | <i>IRS1</i>          | chr2:227367970-227371698 |
|  | <i>VHL</i>           | chr3:10158319-10168746   |
|  | <i>C3orf60</i>       | chr3:49034078-49035930   |
|  | <i>RRP9</i>          | chr3:51942486-51950962   |
|  | <i>RPN1</i>          | chr3:129821503-129852409 |
|  | <i>FNDC3B</i>        | chr3:173241080-173601181 |
|  | <i>RNF168</i>        | chr3:197683025-197714979 |
|  | <i>WDR53</i>         | chr3:197765456-197779810 |
|  | <i>SLIT2</i>         | chr4:19864333-20229886   |
|  | <i>KCNIP4</i>        | chr4:20339337-21559472   |
|  | <i>APBB2</i>         | chr4:40510996-40641847   |
|  | <i>RAP1GDS1</i>      | chr4:99401550-99584035   |
|  | <i>BC033172:-620</i> | chr4:183299799-183301557 |
|  | <i>PDLIM3</i>        | chr4:186659845-186693706 |
|  | <i>ANKRD43</i>       | chr5:132176932-132180388 |
|  | <i>LOC153328</i>     | chr5:135198264-135252223 |
|  | <i>NRG2</i>          | chr5:139207444-139403063 |
|  | <i>ADRA1B</i>        | chr5:159276318-159332595 |
|  | <i>NKX2-5</i>        | chr5:172591744-172594868 |
|  | <i>SERPINB6</i>      | chr6:2893392-2917398     |
|  | <i>SLC35D3</i>       | chr6:137285095-137288469 |
|  | <i>BC014953:110</i>  | chr6:139391512-139406132 |
|  | <i>TTYH3</i>         | chr7:2653578-2670962     |
|  | <i>DAGLB</i>         | chr7:6415285-6490374     |
|  | <i>KIAA1706</i>      | chr7:36159361-36307677   |
|  | <i>ASL</i>           | chr7:65178269-65186106   |
|  | <i>TMEM130</i>       | chr7:98283077-98305573   |
|  | <i>PTCD1</i>         | chr7:98854682-98874355   |
|  | <i>ZNF789</i>        | chr7:98908451-98923153   |
|  | <i>CUTL1</i>         | chr7:101247602-101680064 |
|  | <i>NOM1</i>          | chr7:156447606-156449580 |
|  | <i>SOX7</i>          | chr8:10618688-10625432   |
|  | <i>CEBPD</i>         | chr8:48812029-48813279   |
|  | <i>CA13</i>          | chr8:86344968-86383554   |
|  | <i>OSGIN2</i>        | chr8:90983935-91009270   |
|  | <i>FBXO43</i>        | chr8:101218297-101227252 |
|  | <i>DPYS</i>          | chr8:105461917-105500258 |
|  | <i>ZHX2</i>          | chr8:124032932-124035445 |
|  | <i>NIBP</i>          | chr8:140811770-141537860 |
|  | <i>PCSK5</i>         | chr9:77986134-77998155   |
|  | <i>FSD1L</i>         | chr9:107250146-107333065 |

|  |                      |                           |
|--|----------------------|---------------------------|
|  | <i>FAM78A</i>        | chr9:133123286-133141727  |
|  | <i>BC037281:-910</i> | chr10:11693309-11694231   |
|  | <i>CACNB2</i>        | chr10:18669620-18847351   |
|  | <i>KIAA1217</i>      | chr10:24548561-24876778   |
|  | <i>PAPSS2</i>        | chr10:89410692-89477226   |
|  | <i>AVP11</i>         | chr10:99427171-99437005   |
|  | <i>HMX2</i>          | chr10:124897628-124900178 |
|  | <i>RPLP2</i>         | chr11:800185-802876       |
|  | <i>CCKBR</i>         | chr11:6248582-6249151     |
|  | <i>KCNJ11</i>        | chr11:17363983-17367440   |
|  | <i>NRXN2</i>         | chr11:64130222-64247236   |
|  | <i>RASGRP2</i>       | chr11:64250959-64269504   |
|  | <i>FGF19</i>         | chr11:69222187-69228287   |
|  | <i>ARHGEF17</i>      | chr11:72697317-72757784   |
|  | <i>ESAM</i>          | chr11:124128302-124137433 |
|  | <i>FLI1</i>          | chr11:128069199-128186099 |
|  | <i>ITPR2</i>         | chr12:26431634-26538540   |
|  | <i>PTHLH</i>         | chr12:28006521-28016183   |
|  | <i>KCNH3</i>         | chr12:48219207-48238344   |
|  | <i>NDUFA4L2</i>      | chr12:55914953-55920742   |
|  | <i>AVPR1A</i>        | chr12:61826483-61832857   |
|  | <i>NFYB</i>          | chr12:103049040-103056170 |
|  | <i>MSI1</i>          | chr12:119263516-119291341 |
|  | <i>DYNLL1</i>        | chr12:119418242-119420681 |
|  | <i>ATP8A2</i>        | chr13:25039271-25399421   |
|  | <i>HS6ST3</i>        | chr13:95541094-96289813   |
|  | <i>LRP10</i>         | chr11:46876685-46896652   |
|  | <i>TM9SF1</i>        | chr14:23730782-23732315   |
|  | <i>C14orf104</i>     | chr14:49161642-49171698   |
|  | <i>GALNTL1</i>       | chr14:68796668-68889141   |
|  | <i>ZFYVE1</i>        | chr14:72505912-72563592   |
|  | <i>CINP</i>          | chr14:101884369-101899006 |
|  | <i>SIVA1</i>         | chr14:104290515-104297041 |
|  | <i>GABRG3</i>        | chr15:24799263-25451729   |
|  | <i>KIAA1370</i>      | chr15:50664234-50758245   |
|  | <i>ETFA</i>          | chr15:74295684-74390865   |
|  | <i>ZNF75A</i>        | chr16:3298361-3308577     |
|  | <i>C16orf45</i>      | chr16:15503624-15589418   |
|  | <i>SULT1A1</i>       | chr16:28524417-28542367   |
|  | <i>YPEL3</i>         | chr16:30012584-30015022   |
|  | <i>ZNF688</i>        | chr16:30488524-30491229   |
|  | <i>GPT2</i>          | chr16:45515246-45522699   |
|  | <i>CDH11</i>         | chr16:63538184-63596445   |

|                                                        |                     |                           |
|--------------------------------------------------------|---------------------|---------------------------|
|                                                        | <i>MON1B</i>        | chr16:75785366-75791044   |
|                                                        | <i>CYB5D2</i>       | chr17:3993211-4007740     |
|                                                        | <i>HES7</i>         | chr17:7965024-7968127     |
|                                                        | <i>NTN1</i>         | chr17:8865584-9088042     |
|                                                        | <i>ULK2</i>         | chr17:19618058-19711822   |
|                                                        | <i>TNFAIP1</i>      | chr17:23686913-23698160   |
|                                                        | <i>GJC1</i>         | chr17:40237521-40238711   |
|                                                        | <i>SOCS3</i>        | chr17:73866094-73866771   |
|                                                        | <i>DSC3</i>         | chr18:26824050-26876779   |
|                                                        | <i>CBLN2</i>        | chr18:68354895-68362703   |
|                                                        | <i>SALL3</i>        | chr18:74854042-74859181   |
|                                                        | <i>FAM108A1</i>     | chr19:1827975-1836432     |
|                                                        | <i>PLEKHJ1</i>      | chr19:2184155-2187951     |
|                                                        | <i>TLE6</i>         | chr19:2928562-2946176     |
|                                                        | <i>ATCAY</i>        | chr19:3860484-3879080     |
|                                                        | <i>SH3GL1</i>       | chr19:4311367-4351471     |
|                                                        | <i>CLPP</i>         | chr19:6317251-6319915     |
|                                                        | <i>DNAJB1</i>       | chr19:14486582-14490201   |
|                                                        | <i>MDS032</i>       | chr19:17187155-17191638   |
|                                                        | <i>FAM125A</i>      | chr19:17393714-17397140   |
|                                                        | <i>FOSB</i>         | chr19:50663093-50670277   |
|                                                        | <i>HIF3A</i>        | chr19:51498716-51538530   |
|                                                        | <i>SLC17A7</i>      | chr19:54628328-54633383   |
|                                                        | <i>PNKP</i>         | chr19:55056273-55062630   |
|                                                        | <i>SYT5</i>         | chr19:60378352-60382266   |
|                                                        | <i>ZNF419A</i>      | chr19:62690891-62697860   |
|                                                        | <i>C20orf42</i>     | chr20:6003492-6052191     |
|                                                        | <i>ATP6V1E1</i>     | chr22:16454903-16491588   |
|                                                        | <i>AIFM3</i>        | chr22:19658802-19665649   |
|                                                        | <i>PHF21B</i>       | chr22:43655706-43784245   |
|                                                        | <i>BRD1</i>         | chr22:48552941-48604456   |
|                                                        | <i>CTPS2</i>        | chrX:16516043-16640980    |
|                                                        | <i>APOO</i>         | chrX:23761398-23835955    |
|                                                        | <i>OTUD5</i>        | chrX:48664432-48699837    |
|                                                        | <i>LOC203547</i>    | chrX:150316435-150324185  |
|                                                        | <i>TMSB4Y</i>       | chrY:14324841-14327296    |
| Frequently methylated only in stage IV CRCs (49 genes) |                     |                           |
|                                                        | <i>ADAM12</i>       | chr10:127719904-128067055 |
|                                                        | <i>AGTR1</i>        | chr3:149930657-149943480  |
|                                                        | <i>ALAD</i>         | chr9:115188413-115203439  |
|                                                        | <i>ANTXR1</i>       | chr2:69093993-69329806    |
|                                                        | <i>BC058917:-87</i> | chr12:77782972-78367943   |
|                                                        | <i>C16orf46</i>     | chr16:79644603-79668373   |

|  |                  |                           |
|--|------------------|---------------------------|
|  | <i>CARM1</i>     | chr19:10843253-10894448   |
|  | <i>CCDC12</i>    | chr3:46938225-46993243    |
|  | <i>CNIH3</i>     | chr1:222870802-222994872  |
|  | <i>DNAJB2</i>    | chr2:219855708-219859866  |
|  | <i>DYX1C1</i>    | chr15:53509798-53587724   |
|  | <i>EML3</i>      | chr11:62130111-62135392   |
|  | <i>FBXO44</i>    | chr1:11637501-11645971    |
|  | <i>FHL2</i>      | chr2:105343715-105382113  |
|  | <i>FLJ10916</i>  | chr2:88250950-88267261    |
|  | <i>FLJ39237</i>  | chr7:100600498-100610277  |
|  | <i>FLJ44815</i>  | chr17:29925255-29930501   |
|  | <i>FLT4</i>      | chr5:179967359-180009230  |
|  | <i>GPR137</i>    | chr11:63794110-63812262   |
|  | <i>GRAMD2</i>    | chr15:70241659-70277180   |
|  | <i>HOXD4</i>     | chr2:176724359-176726195  |
|  | <i>INTS3</i>     | chr1:151967173-152013179  |
|  | <i>KCNK2</i>     | chr1:213245508-213477059  |
|  | <i>KHK</i>       | chr2:27163115-27177123    |
|  | <i>LINGO1</i>    | chr15:75692424-75775530   |
|  | <i>LOC375748</i> | chr9:130078246-130088634  |
|  | <i>LOC554235</i> | chr19:55706669-55709759   |
|  | <i>LPPR2</i>     | chr19:11327107-11337372   |
|  | <i>LRRC20</i>    | chr10:71728735-71812388   |
|  | <i>MAN2C1</i>    | chr15:73435186-73447994   |
|  | <i>MRPS25</i>    | chr3:15065023-15081820    |
|  | <i>MSC</i>       | chr8:72916331-72919285    |
|  | <i>NUP98</i>     | chr11:3689635-3775468     |
|  | <i>PPIF</i>      | chr10:80777226-80785095   |
|  | <i>SIAH1</i>     | chr16:46952992-46953840   |
|  | <i>SLC37A3</i>   | chr7:139680021-139744780  |
|  | <i>TIFA</i>      | chr4:113418467-113419021  |
|  | <i>TMEM139</i>   | chr7:142692166-142695263  |
|  | <i>VGf</i>       | chr7:100592517-100595572  |
|  | <i>VGLL3</i>     | chr3:87069813-87122947    |
|  | <i>VPS16</i>     | chr20:2792595-2795380     |
|  | <i>ZNF19</i>     | chr16:70065477-70080718   |
|  | <i>ZNF207</i>    | chr17:27711730-27732088   |
|  | <i>ZNF259</i>    | chr11:116154486-116163949 |
|  | <i>ZNF526</i>    | chr19:47420396-47422408   |
|  | <i>ZNF550</i>    | chr19:62745020-62763040   |
|  | <i>ZNF563</i>    | chr19:12291005-12305502   |
|  | <i>ZNF790</i>    | chr19:42000171-42021124   |
|  | <i>ZBPB</i>      | chr7:49947585-50103372    |



| Frequently methylated in both stage I-III and stage IV CRCs (290 genes) |                     |                           |
|-------------------------------------------------------------------------|---------------------|---------------------------|
|                                                                         | <i>C9orf50</i>      | chr9:131414325-131422876  |
|                                                                         | <i>SNF1LK</i>       | chr21:43658827-43671430   |
|                                                                         | <i>C2orf32</i>      | chr2:68373646-68400687    |
|                                                                         | <i>ITGA4</i>        | chr2:182095156-182110713  |
|                                                                         | <i>TMEFF2</i>       | chr2:192749714-192767889  |
|                                                                         | <i>FGF12</i>        | chr3:193342422-193928066  |
|                                                                         | <i>CCDC4</i>        | chr4:41807714-41849652    |
|                                                                         | <i>MDF1</i>         | chr6:41714176-41729960    |
|                                                                         | <i>RSPO2</i>        | chr8:108980720-109164742  |
|                                                                         | <i>DMRT1</i>        | chr9:831690-959090        |
|                                                                         | <i>NRG3</i>         | chr10:84549478-84735341   |
|                                                                         | <i>PHOX2A</i>       | chr11:71627769-71632868   |
|                                                                         | <i>TMEM132D</i>     | chr12:128122224-128954165 |
|                                                                         | <i>LRFN5</i>        | chr14:41238380-41443499   |
|                                                                         | <i>SALL1</i>        | chr16:49728524-49742684   |
|                                                                         | <i>AK124155:-10</i> | chr19:12064078-12071475   |
|                                                                         | <i>AK124155:112</i> | chr19:12064078-12071475   |
|                                                                         | <i>ZNF667</i>       | chr19:61643018-61680555   |
|                                                                         | <i>TBX15</i>        | chr1:119227189-119243271  |
|                                                                         | <i>ALK</i>          | chr2:29269144-29997936    |
|                                                                         | <i>ZIC1</i>         | chr3:148609871-148617196  |
|                                                                         | <i>KCNAB1</i>       | chr3:157491470-157739621  |
|                                                                         | <i>NPY2R</i>        | chr4:156354542-156355687  |
|                                                                         | <i>CYP26C1</i>      | chr10:94811011-94818444   |
|                                                                         | <i>MYOD1</i>        | chr11:17697686-17700254   |
|                                                                         | <i>NELL1</i>        | chr11:20647712-21553577   |
|                                                                         | <i>CHST11</i>       | chr12:103374879-103676013 |
|                                                                         | <i>CUTL2</i>        | chr12:109956212-110272739 |
|                                                                         | <i>SLC13A5</i>      | chr17:6538140-6557388     |
|                                                                         | <i>C17orf46</i>     | chr17:40687543-40695262   |
|                                                                         | <i>VSX1</i>         | chr20:25000132-25010767   |
|                                                                         | <i>GRIK1</i>        | chr21:29875616-30234153   |
|                                                                         | <i>DSCR6</i>        | chr21:37300320-37313828   |
|                                                                         | <i>FRMPD4</i>       | chrX:12066506-12650450    |
|                                                                         | <i>PAP2D</i>        | chr1:99128389-99243037    |
|                                                                         | <i>LOC388969</i>    | chr2:85690667-85692663    |
|                                                                         | <i>GATA2</i>        | chr3:129680960-129694718  |
|                                                                         | <i>GATA4</i>        | chr8:11599126-11603846    |
|                                                                         | <i>XKR4</i>         | chr8:56177571-56601264    |
|                                                                         | <i>FLJ46831</i>     | chr10:129425945-129429440 |
|                                                                         | <i>HNT</i>          | chr11:131586861-131711926 |
|                                                                         | <i>ST6GALNAC5</i>   | chr1:77105774-77302325    |

|  |                            |                           |
|--|----------------------------|---------------------------|
|  | <i>GDNF</i>                | chr5:37851510-37870767    |
|  | <i>AK023251:-177</i>       | chr6:72180870-72187169    |
|  | <i>PRDM14</i>              | chr8:71126577-71146116    |
|  | <i>GFRA1</i>               | chr10:117812943-118022966 |
|  | <i>NTRK3</i>               | chr15:86321599-86377280   |
|  | <i>CA10</i>                | chr17:47065836-47592376   |
|  | <i>NETO1</i>               | chr18:68652255-68683914   |
|  | <i>KCNG1</i>               | chr20:49058624-49073024   |
|  | <i>CSPG5</i>               | chr3:47578732-47595363    |
|  | <i>MATR3</i>               | chr5:138637691-138686555  |
|  | <i>PENK</i>                | chr8:57520358-57521788    |
|  | <i>SYT9</i>                | chr11:7229757-7446846     |
|  | <i>PTPN5</i>               | chr11:18706051-18769965   |
|  | <i>GABRA5</i>              | chr15:24663151-24776749   |
|  | <i>DKFZp666G057</i>        | chr15:80342207-80364320   |
|  | <i>NRXN1</i>               | chr2:51003297-51113178    |
|  | <i>TMEM132E</i>            | chr17:29931881-29990450   |
|  | <i>TDRD10</i>              | chr1:152741319-152787247  |
|  | <i>TFPI2</i>               | chr7:93353681-93358001    |
|  | <i>FBN1</i>                | chr15:46487797-46547591   |
|  | <i>PAX1</i>                | chr20:21634297-21644620   |
|  | <i>hsa-mir-124a-3:-454</i> | chr20:61280297-61280383   |
|  | <i>HTR2C</i>               | chrX:113724807-114050880  |
|  | <i>GRIK3</i>               | chr1:37042806-37272431    |
|  | <i>ESR1</i>                | chr6:152243483-152423952  |
|  | <i>WDR86</i>               | chr7:150709140-150738673  |
|  | <i>NRG1</i>                | chr8:32624071-32720312    |
|  | <i>AK094650:-294</i>       | chr8:69406011-69522799    |
|  | <i>DBC1</i>                | chr9:121015719-121171560  |
|  | <i>URM1</i>                | chr9:130173461-130192834  |
|  | <i>MYO3A</i>               | chr10:26264679-26541471   |
|  | <i>TRPC6</i>               | chr11:100829591-100959869 |
|  | <i>FZD10</i>               | chr12:129212985-129216238 |
|  | <i>CCNA1</i>               | chr13:35904409-35915019   |
|  | <i>CLDN10</i>              | chr13:95002961-95029907   |
|  | <i>SLC24A4</i>             | chr14:91975432-92032349   |
|  | <i>ABHD9</i>               | chr19:15198730-15204768   |
|  | <i>ZNF415</i>              | chr19:58302944-58327957   |
|  | <i>CHST2</i>               | chr3:144322349-144323941  |
|  | <i>NXPH1</i>               | chr7:8440110-8759118      |
|  | <i>TWIST1</i>              | chr7:19122861-19123469    |
|  | <i>WBSCR17</i>             | chr7:70403664-70816520    |
|  | <i>DBX1</i>                | chr11:20134336-20138446   |

|  |                 |                           |
|--|-----------------|---------------------------|
|  | <i>FADS1</i>    | chr11:61323677-61340886   |
|  | <i>THY1</i>     | chr11:118794098-118799064 |
|  | <i>FAIM2</i>    | chr12:48546947-48584032   |
|  | <i>TRHDE</i>    | chr12:70952730-71345689   |
|  | <i>FBXO39</i>   | chr17:6630823-6641144     |
|  | <i>SLC4A11</i>  | chr20:3156063-3167836     |
|  | <i>CBLN4</i>    | chr20:54005903-54013419   |
|  | <i>STOX2</i>    | chr4:185167305-185175869  |
|  | <i>COL9A1</i>   | chr6:70982464-71069507    |
|  | <i>RSPO3</i>    | chr6:127481741-127560603  |
|  | <i>SLC46A2</i>  | chr9:114681021-114692866  |
|  | <i>SOX5</i>     | chr12:23587412-23995132   |
|  | <i>ACAN</i>     | chr15:87200760-87219589   |
|  | <i>FLJ40125</i> | chr19:50692354-50697604   |
|  | <i>PPP1R16B</i> | chr20:36897882-36985081   |
|  | <i>BHLHB4</i>   | chr20:61107846-61108787   |
|  | <i>TMEM61</i>   | chr1:55219053-55230554    |
|  | <i>FBXL7</i>    | chr5:15553305-15992900    |
|  | <i>KIAA1688</i> | chr8:145725371-145809696  |
|  | <i>PVRL1</i>    | chr11:119050309-119104645 |
|  | <i>ADCY4</i>    | chr14:23871301-23874102   |
|  | <i>PRIMA1</i>   | chr14:93254397-93324519   |
|  | <i>BNC1</i>     | chr15:81715659-81744472   |
|  | <i>HBM</i>      | chr16:155973-156767       |
|  | <i>CBLN1</i>    | chr16:47870200-47873184   |
|  | <i>SLFN13</i>   | chr17:30786228-30799885   |
|  | <i>NCAM2</i>    | chr21:21292504-21833085   |
|  | <i>FGF13</i>    | chrX:138113887-138114818  |
|  | <i>SOX3</i>     | chrX:139412818-139414891  |
|  | <i>C14orf39</i> | chr14:59972427-60022517   |
|  | <i>ZNF347</i>   | chr19:58334460-58354096   |
|  | <i>SETDB1</i>   | chr1:149165581-149202945  |
|  | <i>CADM3</i>    | chr1:157408001-157433474  |
|  | <i>CD34</i>     | chr1:206126506-206151306  |
|  | <i>EGFLAM</i>   | chr5:38498449-38501338    |
|  | <i>HTR1E</i>    | chr6:87781772-87782869    |
|  | <i>ADCY1</i>    | chr7:45580650-45729239    |
|  | <i>AUTS2</i>    | chr7:68701841-69895821    |
|  | <i>ADRB3</i>    | chr8:37939673-37943341    |
|  | <i>ITGA8</i>    | chr10:15599094-15801776   |
|  | <i>ZNF606</i>   | chr19:63180253-63206526   |
|  | <i>C2orf40</i>  | chr2:106048545-106061041  |
|  | <i>FAM19A4</i>  | chr3:68863607-69064401    |

|  |                    |                           |
|--|--------------------|---------------------------|
|  | <i>SPOCK1</i>      | chr5:136338886-136862917  |
|  | <i>BARHL1</i>      | chr9:134447814-134455461  |
|  | <i>FLJ21963</i>    | chr12:79995989-80172990   |
|  | <i>MEGF11</i>      | chr15:63978120-64333129   |
|  | <i>HS3ST3A1</i>    | chr17:13339731-13445969   |
|  | <i>CLDN5</i>       | chr22:17891122-17891778   |
|  | <i>LIN28</i>       | chr1:26609856-26628806    |
|  | <i>TRIB2</i>       | chr2:12774449-12800309    |
|  | <i>SCTR</i>        | chr2:119913889-119998498  |
|  | <i>KY</i>          | chr3:135801455-135852554  |
|  | <i>HIST1H4J</i>    | chr6:27899882-27900237    |
|  | <i>NPTX2</i>       | chr7:98086915-98094592    |
|  | <i>SDC2</i>        | chr8:97575058-97693213    |
|  | <i>CLIP3</i>       | chr19:41197403-41215381   |
|  | <i>SNAP25</i>      | chr20:10147477-10236065   |
|  | <i>ARHGAP6</i>     | chrX:11071438-11218519    |
|  | <i>NID1</i>        | chr1:234205755-234295104  |
|  | <i>ERBB4</i>       | chr2:212134732-213111597  |
|  | <i>TSP50</i>       | chr3:46728610-46829068    |
|  | <i>ZFP42</i>       | chr4:189160956-189161888  |
|  | <i>TLX3</i>        | chr5:170668893-170671743  |
|  | <i>HOXA6</i>       | chr7:27151641-27153893    |
|  | <i>CYP7B1</i>      | chr8:65671083-65873902    |
|  | <i>SHC3</i>        | chr9:90817889-90983502    |
|  | <i>DFNB31</i>      | chr9:116280422-116307551  |
|  | <i>TCERG1L</i>     | chr10:132786559-132948697 |
|  | <i>WT1</i>         | chr11:32266639-32467137   |
|  | <i>SLC1A2</i>      | chr11:35229328-35398100   |
|  | <i>GPC6</i>        | chr13:92995517-93282343   |
|  | <i>SUMO2</i>       | chr17:70675420-70690693   |
|  | <i>BC101050:59</i> | chr19:52716057-52716057   |
|  | <i>ADAMTS1</i>     | chr21:27130477-27139599   |
|  | <i>RGN</i>         | chrX:46822719-46837656    |
|  | <i>TBX19</i>       | chr1:166533486-166550288  |
|  | <i>ACTA1</i>       | chr1:227633616-227636466  |
|  | <i>LRRN1</i>       | chr3:3861326-3863476      |
|  | <i>MED12L</i>      | chr3:152556374-152588650  |
|  | <i>SNCA</i>        | chr4:90865728-90975866    |
|  | <i>POU4F3</i>      | chr5:145698869-145700200  |
|  | <i>ELOVL4</i>      | chr6:80681248-80714034    |
|  | <i>LOC401498</i>   | chr8:65649420-65652374    |
|  | <i>LMX1B</i>       | chr9:128416569-128503132  |
|  | <i>MTNR1B</i>      | chr11:92342437-92355596   |

|  |                     |                           |
|--|---------------------|---------------------------|
|  | <i>IRAK3</i>        | chr12:64869284-64928652   |
|  | <i>ARHGEF7</i>      | chr13:110691493-110726379 |
|  | <i>CATSPER2</i>     | chr15:41710064-41727553   |
|  | <i>WNT3</i>         | chr17:42196857-42251081   |
|  | <i>RAX</i>          | chr18:55085247-55091605   |
|  | <i>CACNG8</i>       | chr19:59158106-59177951   |
|  | <i>PLCB1</i>        | chr20:8061296-8578636     |
|  | <i>PREX1</i>        | chr20:46674200-46877827   |
|  | <i>C20orf58</i>     | chr20:61342584-61356335   |
|  | <i>CLIC6</i>        | chr21:34963558-35012389   |
|  | <i>ESX1</i>         | chrX:103381375-103386244  |
|  | <i>FIGN</i>         | chr2:164172364-164300759  |
|  | <i>OSMR</i>         | chr5:38881893-38970159    |
|  | <i>NR0B1</i>        | chrX:30232460-30237416    |
|  | <i>TDGF1</i>        | chr3:46594217-46598956    |
|  | <i>PDE8B</i>        | chr5:76542462-76758984    |
|  | <i>HOXA5</i>        | chr7:27147521-27149812    |
|  | <i>EPO</i>          | chr7:100156359-100159259  |
|  | <i>BC058917:118</i> | chr12:77783089-77783089   |
|  | <i>COL24A1</i>      | chr1:86283399-86395034    |
|  | <i>PLD5</i>         | chr1:240318895-240754621  |
|  | <i>CCK</i>          | chr5:43412505-43448245    |
|  | <i>SOX14</i>        | chr3:138966269-138967086  |
|  | <i>ADRB2</i>        | chr5:148186349-148188381  |
|  | <i>VWC2</i>         | chr7:49783803-49922684    |
|  | <i>TNFRSF10C</i>    | chr8:23016379-23030895    |
|  | <i>ADARB2</i>       | chr10:1218073-1769718     |
|  | <i>NKX6-2</i>       | chr10:134448310-134449527 |
|  | <i>CALCB</i>        | chr11:15051722-15060464   |
|  | <i>PRMT8</i>        | chr12:3360776-3573399     |
|  | <i>CACNG3</i>       | chr16:24174377-24281238   |
|  | <i>FLJ44968</i>     | chr19:19500720-19509393   |
|  | <i>MN1</i>          | chr22:26474265-26517871   |
|  | <i>HSPA6</i>        | chr1:159760660-159763311  |
|  | <i>CACNA1D</i>      | chr3:53504071-53821532    |
|  | <i>TMEM108</i>      | chr3:134581251-134597747  |
|  | <i>OSAP</i>         | chr4:140406767-140420942  |
|  | <i>MEOX2</i>        | chr7:15617362-15692833    |
|  | <i>PDE1C</i>        | chr7:31795772-32077516    |
|  | <i>FIGNL1</i>       | chr7:50480455-50482479    |
|  | <i>CNTNAP2</i>      | chr7:147667486-147749019  |
|  | <i>ASAH3L</i>       | chr9:19398925-19442500    |
|  | <i>ITIH5</i>        | chr10:7653374-7748940     |

|  |                  |                           |
|--|------------------|---------------------------|
|  | <i>GATA3</i>     | chr10:8136673-8157170     |
|  | <i>C10orf53</i>  | chr10:50557690-50586962   |
|  | <i>SLC16A12</i>  | chr10:91180036-91285293   |
|  | <i>EMX2</i>      | chr10:119291946-119299047 |
|  | <i>UTF1</i>      | chr10:134893768-134895052 |
|  | <i>SCT</i>       | chr11:616313-617173       |
|  | <i>SOX21</i>     | chr13:94159880-94162390   |
|  | <i>MYCBPAP</i>   | chr17:45940811-45963861   |
|  | <i>IL11</i>      | chr19:60567569-60573626   |
|  | <i>SCUBE1</i>    | chr22:41963526-42069299   |
|  | <i>AK5</i>       | chr1:77520875-77798242    |
|  | <i>GNB4</i>      | chr3:180596570-180652065  |
|  | <i>D4S234E</i>   | chr4:4440213-4471686      |
|  | <i>DDIT4L</i>    | chr4:101326050-101330636  |
|  | <i>GRIA2</i>     | chr4:158361844-158502254  |
|  | <i>NEFM</i>      | chr8:24828360-24832511    |
|  | <i>LY6K</i>      | chr8:143778533-143782613  |
|  | <i>COL5A1</i>    | chr9:136673473-136876509  |
|  | <i>WIT1</i>      | chr11:32413861-32418196   |
|  | <i>FADS2</i>     | chr11:61352289-61391401   |
|  | <i>COL2A1</i>    | chr12:46653015-46668521   |
|  | <i>C13orf21</i>  | chr13:43846159-43862587   |
|  | <i>FAM100A</i>   | chr16:4598885-4604928     |
|  | <i>PTPRM</i>     | chr18:7557314-8396859     |
|  | <i>THBD</i>      | chr20:22976594-22978141   |
|  | <i>ANKRD53</i>   | chr2:71059083-71066137    |
|  | <i>FEZF2</i>     | chr3:62330387-62334230    |
|  | <i>SERP1</i>     | chr3:151742470-151803705  |
|  | <i>CXCL14</i>    | chr5:134934274-134942868  |
|  | <i>ANKRD6</i>    | chr6:90387654-90400124    |
|  | <i>EYA4</i>      | chr6:133825452-133894951  |
|  | <i>LY6H</i>      | chr8:144310706-144313428  |
|  | <i>SYCP1</i>     | chr1:115198978-115339513  |
|  | <i>BACH2</i>     | chr6:90716596-91063182    |
|  | <i>DFNA5</i>     | chr7:24704499-24764164    |
|  | <i>MMP16</i>     | chr8:89150577-89408833    |
|  | <i>GDF6</i>      | chr8:97223734-97242196    |
|  | <i>DMRTA1</i>    | chr9:22436840-22442472    |
|  | <i>UAP1L1</i>    | chr9:139091774-139098811  |
|  | <i>KCNIP2</i>    | chr10:103575721-103593667 |
|  | <i>LOC643923</i> | chr11:106967681-106969159 |
|  | <i>LITAF</i>     | chr16:11557642-11588290   |
|  | <i>COMMD7</i>    | chr20:30754154-30795475   |

|  |                     |                           |
|--|---------------------|---------------------------|
|  | <i>RCSD1</i>        | chr1:165865954-165942110  |
|  | <i>EDARADD</i>      | chr1:234625339-234714631  |
|  | <i>FIGLA</i>        | chr2:70857950-70871283    |
|  | <i>LRPIB</i>        | chr2:140705466-142605740  |
|  | <i>VEGFC</i>        | chr4:177841685-177950889  |
|  | <i>CMYA5</i>        | chr5:79021415-79131805    |
|  | <i>TCF21</i>        | chr6:134251970-134255086  |
|  | <i>FLNC</i>         | chr7:128257719-128286564  |
|  | <i>TMEM176B</i>     | chr7:150119309-150129381  |
|  | <i>UNQ9433</i>      | chr8:53609253-53640565    |
|  | <i>MKX</i>          | chr10:28001809-28074784   |
|  | <i>ARMC4</i>        | chr10:28141103-28327797   |
|  | <i>TMEM26</i>       | chr10:62842659-62883214   |
|  | <i>GRID1</i>        | chr10:87349292-88116230   |
|  | <i>CR749804:-94</i> | chr10:125757174-125843196 |
|  | <i>CALCA</i>        | chr11:14945796-14950408   |
|  | <i>RAB39</i>        | chr11:107304487-107339418 |
|  | <i>KCNA5</i>        | chr12:5023346-5026210     |
|  | <i>ATP5G2</i>       | chr12:52345211-52356779   |
|  | <i>C13orf33</i>     | chr13:30378312-30397709   |
|  | <i>BIVM</i>         | chr13:102249400-102291514 |
|  | <i>NFATC4</i>       | chr14:23908199-23916235   |
|  | <i>KCNK10</i>       | chr14:87720999-87863004   |
|  | <i>PYDC1</i>        | chr16:31135581-31135850   |
|  | <i>HSF4</i>         | chr16:65755845-65761349   |
|  | <i>FLJ10847</i>     | chr17:19391890-19422938   |
|  | <i>FAM20A</i>       | chr17:64044860-64108690   |
|  | <i>NOVA2</i>        | chr19:51134631-51168497   |
|  | <i>KCNJ14</i>       | chr19:53656318-53661179   |
|  | <i>SLCO4A1</i>      | chr20:60744242-60774092   |
|  | <i>TIAMI</i>        | chr21:31506818-31854161   |

\* Locations are corresponding to the UCSC Genome Database Assembly Version: May 2004 (<http://genome.ucsc.edu/index.html>). † Average values (cy5/cy3) of 10 cancerous tissues. ‡ Average values (cy5/cy3) of 10 adjacent tissues.
