# Supplementary material
Source: PubMed Central journal article supplement (PMC3078452)

**A**

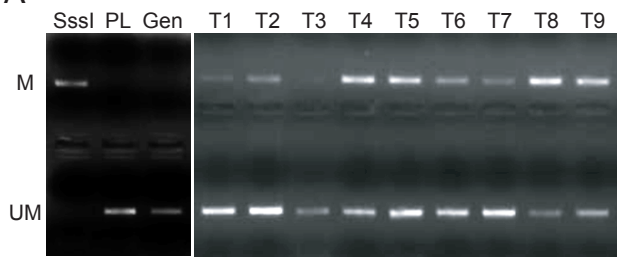

|              |    |   |   |    |    |    |    |    |    |    |    |    |
|--------------|----|---|---|----|----|----|----|----|----|----|----|----|
| MSP (M/M+UM) | 98 | 2 | 0 | 10 | 31 | 6  | 44 | 46 | 36 | 32 | 68 | 55 |
| Pyroseq      | 95 | 5 | 0 | 16 | 16 | 15 | 69 | 53 | 59 | 59 | 88 | 86 |

**B**

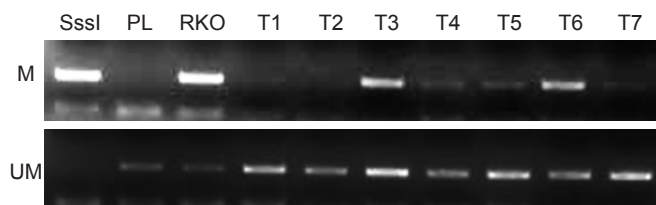

|              |     |   |    |   |   |    |    |    |    |    |
|--------------|-----|---|----|---|---|----|----|----|----|----|
| MSP (M/M+UM) | 100 | 0 | 91 | 8 | 9 | 43 | 17 | 21 | 60 | 12 |
| Pyroseq      | 95  | 5 | 92 | 5 | 7 | 32 | 19 | 35 | 57 | 4  |

Supplement: mmc1.pdf [file mmc1.pdf]
